# Supplementary material for: In-plane growth of large ultra-thin SnS2 nanosheets by tellurium-assisted chemical vapor deposition
Source: Royal Society of Chemistry journal article supplement (doi:10.1039/c7ra02599h), 2017-01-01
Supplement: c7ra02599h1.pdf [file c7ra02599h1.pdf]

## Supporting Information

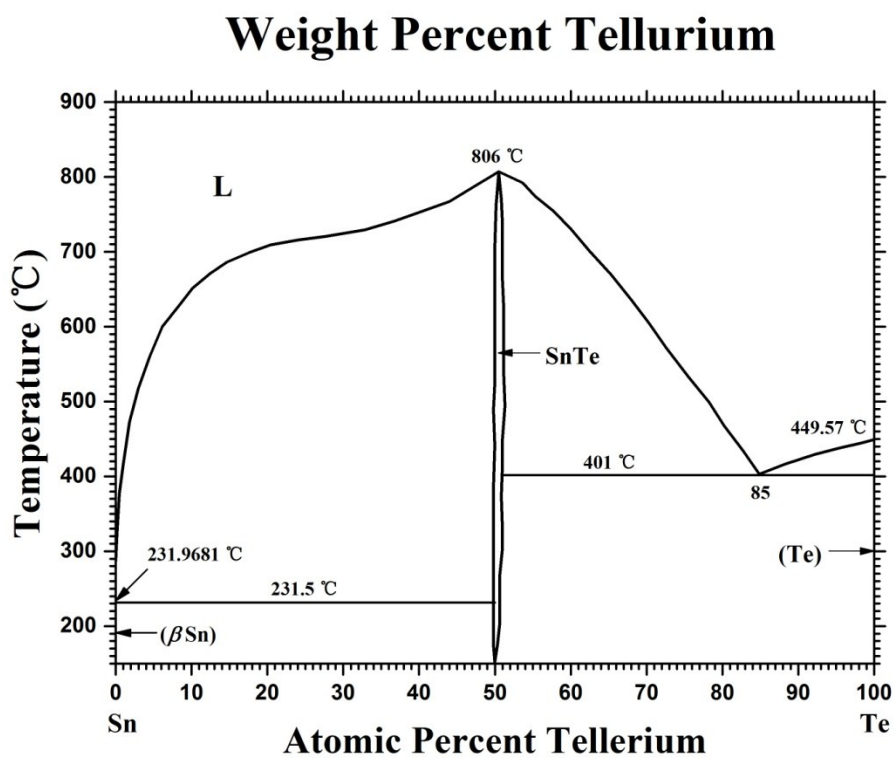

Fig. S1 Binary Sn-Te phase diagram.

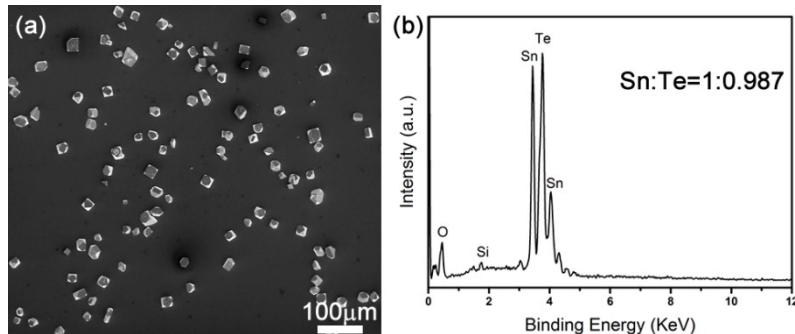

Fig.S2 (a) SEM image of the SnO<sub>2</sub> and Te mixture annealed at 600 °C (without sulfurization); (b) corresponding EDX spectroscopy of SnTe NS.
